# Supplementary material for: Knowledge of Chronic Kidney Disease among the General Population: A Questionnaire Survey in Hokkaido Prefecture, Japan
Source: MDPI journal article supplement (doi:10.3390/jpm12111837), 2022-11-03
Supplement: s1 [file s1]

**Supplementary Table S1.** Questionnaire about knowledge of chronic kidney disease (CKD).

|                                                                                                               |                                                                                                                                                  |
|---------------------------------------------------------------------------------------------------------------|--------------------------------------------------------------------------------------------------------------------------------------------------|
| Please complete the questionnaire about knowledge of chronic kidney disease (CKD).                            |                                                                                                                                                  |
| Please circle the appropriate answer to the following questions.                                              |                                                                                                                                                  |
| (1)                                                                                                           | What is your gender and age?                                                                                                                     |
|                                                                                                               | Male, Female                                                                                                                                     |
|                                                                                                               | 20s, 30s, 40s, 50s, 60s, 70s, 80s                                                                                                                |
| (2)                                                                                                           | Are you familiar with the term "CKD"?                                                                                                            |
|                                                                                                               | 1) Have heard of it                                                                                                                              |
|                                                                                                               | 2) Have heard of it but do not know what it means                                                                                                |
|                                                                                                               | 3) Never heard of it                                                                                                                             |
| (3)                                                                                                           | Do you know the term "chronic kidney disease"?                                                                                                   |
|                                                                                                               | 1) Have heard of it                                                                                                                              |
|                                                                                                               | 2) Have heard of it but do not know what it means                                                                                                |
|                                                                                                               | 3) Never heard of it                                                                                                                             |
| If you chose "Never heard of it" for both (2) and (3), please go to (5).<br>Otherwise, please proceed to (4). |                                                                                                                                                  |
| (4)                                                                                                           | On what occasions have you heard the term chronic kidney disease or CKD? Please choose any number of correct answers (multiple answers allowed). |
|                                                                                                               | Poster/flyer, Newspaper, Television, Radio, Internet, Magazine, Public lecture, Acquaintance, Other                                              |
| (5)                                                                                                           | How is chronic kidney disease (CKD) diagnosed? Please choose any number of correct answers (multiple answers allowed).                           |
|                                                                                                               | Blood pressure, Glomerular filtration rate (GFR), Blood glucose, Serum creatinine, Proteinuria, Hematuria, Proteinuria, Waist circumference      |
| Thank you for your cooperation.                                                                               |                                                                                                                                                  |
